# Supplementary material for: Ancestral reconstruction of reproductive traits shows no tendency toward terrestriality in leptodactyline frogs
Source: PubMed Central journal article supplement (PMC4437749; doi:10.1186/s12862-015-0365-6), 2015-05-20

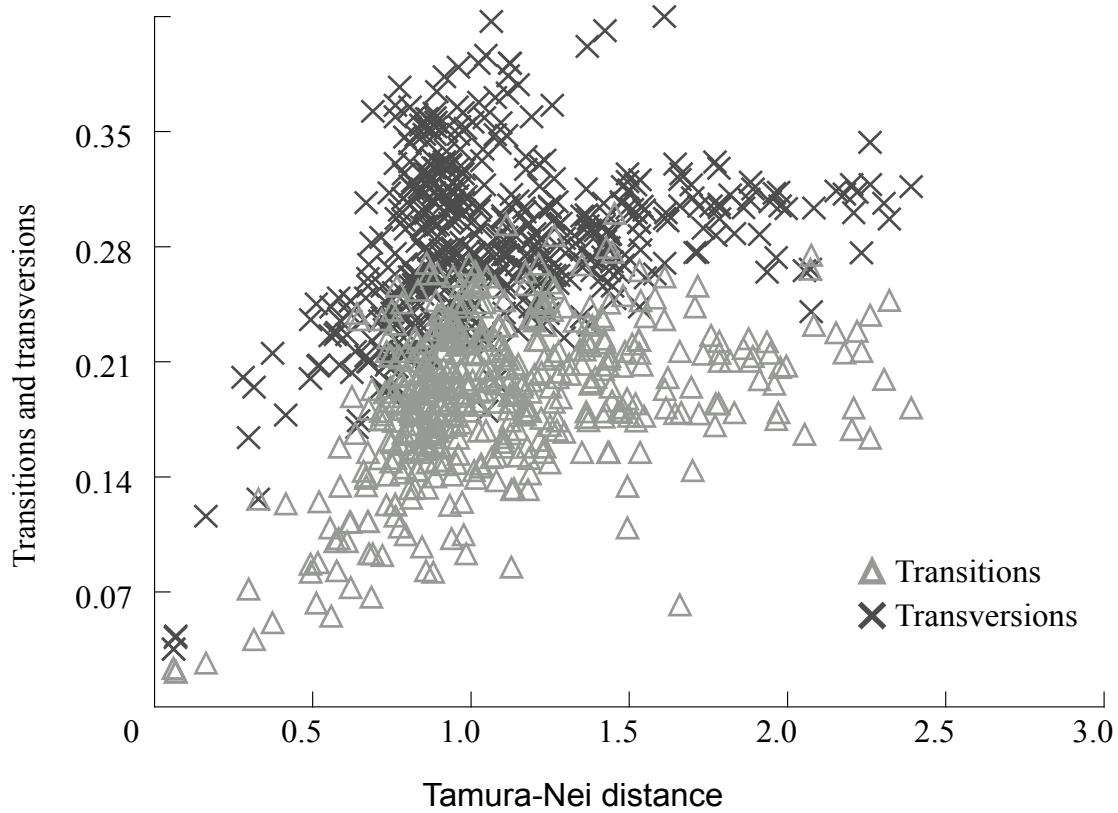

Supplement: 12862_2015_365_MOESM1_ESM.pdf [file 12862_2015_365_MOESM1_ESM.pdf]
